# Supplementary material for: Human virome profiling identified CMV as the major viral driver of a high accumulation of senescent CD8+ T cells in patients with advanced NSCLC
Source: PubMed Central journal article supplement (PMC10631735; doi:10.1126/sciadv.adh0708), 2023-11-08
Supplement: sciadv.adh0708_sm.pdf [file sciadv.adh0708_sm.pdf]

Supplementary Materials for  
**Human virome profiling identified CMV as the major viral driver of a high accumulation of senescent CD8<sup>+</sup> T cells in patients with advanced NSCLC**

Marie Naigeon *et al.*

Corresponding author: Nathalie Chaput, [nathalie.chaput@gustaveroussy.fr](mailto:nathalie.chaput@gustaveroussy.fr)

*Sci. Adv.* **9**, eadh0708 (2023)  
DOI: 10.1126/sciadv.adh0708

**This PDF file includes:**

Figs. S1 to S7  
Tables S1 to S6

**Fig. S1. CD28<sup>-</sup>CD57<sup>+</sup>KLRG1<sup>+</sup>CD8<sup>+</sup> circulating T cells are characterized by higher expression of the transcription factor T-bet and SA-βgal** (A) MFI of SA-βgal was determined in fresh PBMC from n=7 patients with aNSCLC and subsequently analyzed among CD8<sup>+</sup> T cell subpopulations. (B) The expression of T-bet and Eomes transcription factors was assessed on thawed PBMC (n=15) from aNSCLC patients, and visualized among T cell CD8<sup>+</sup> populations as shown on the gating strategy. (C-D) Eomes and T-bet expression was analyzed among CD8<sup>+</sup> subpopulations according to the expression of senescent markers. Differences between groups were analyzed by Wilcoxon test.

**A.**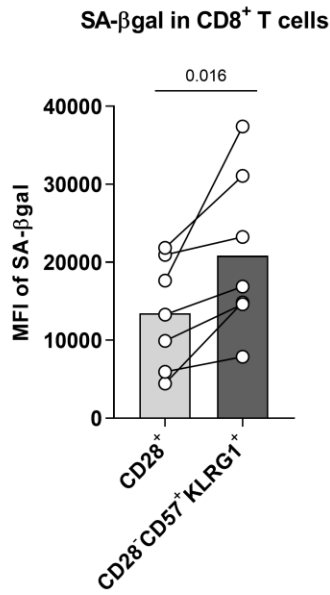**B.**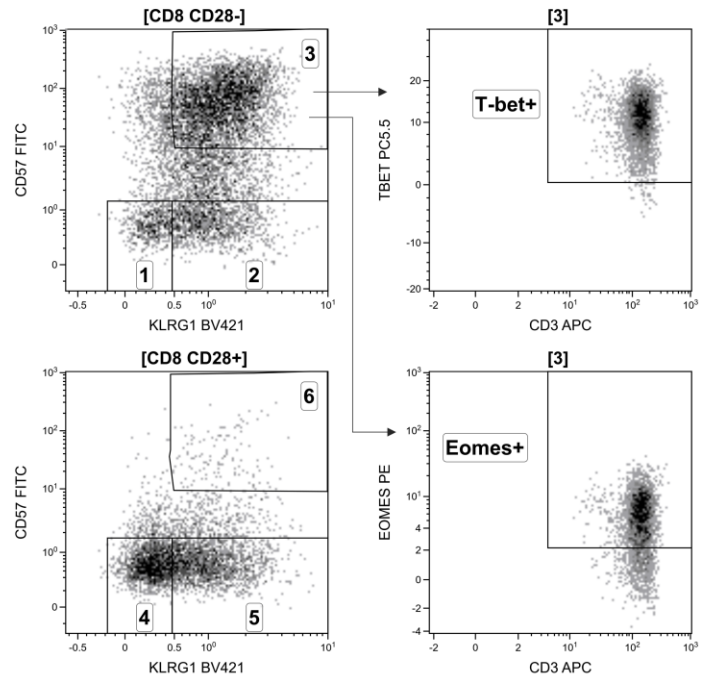

1. CD8 CD28<sup>-</sup> CD57<sup>-</sup> KLRG1<sup>-</sup>  
 2. CD8 CD28<sup>-</sup> CD57<sup>-</sup> KLRG1<sup>+</sup>  
 3. CD8 CD28<sup>-</sup> CD57<sup>+</sup> KLRG1<sup>+</sup>

4. CD8 CD28<sup>+</sup> CD57<sup>-</sup> KLRG1<sup>-</sup>  
 5. CD8 CD28<sup>+</sup> CD57<sup>-</sup> KLRG1<sup>+</sup>  
 6. CD8 CD28<sup>+</sup> CD57<sup>+</sup> KLRG1<sup>+</sup>

**C.**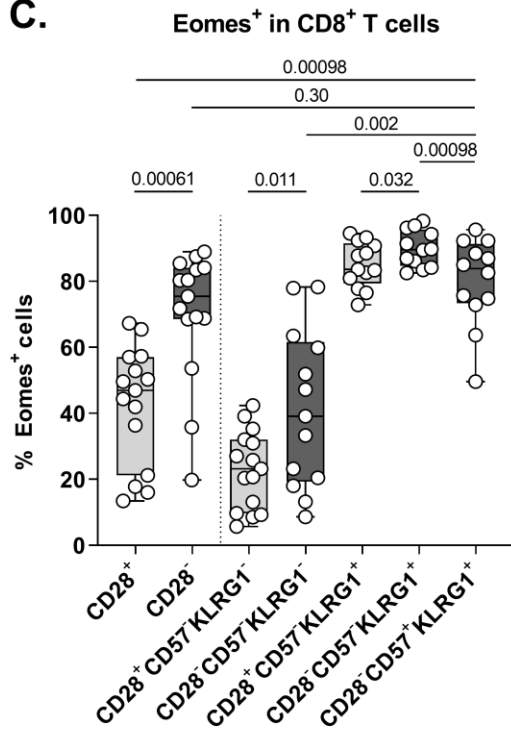**D.**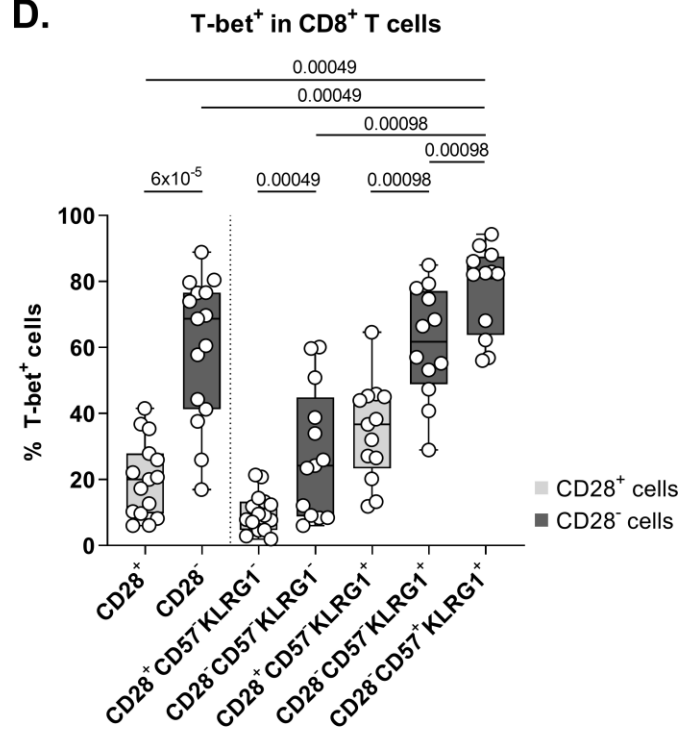

**Fig. S2. Comparison of VirScan™ assay and CMV serology.** CMV-serology was assessed in plasma from samples with a VIRSCAN analysis (n=116). ROC curve comparing both methods showed a threshold of 4 recognized viral-proteins for viral-status positivity, with great sensibility and specificity.

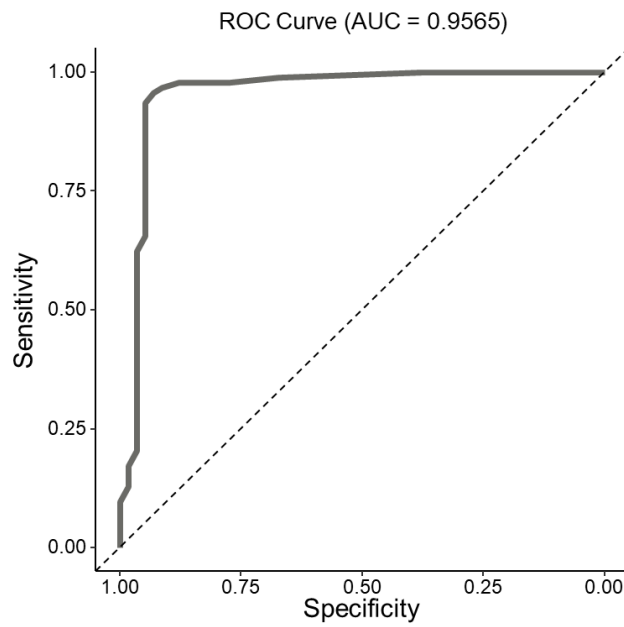

**Fig. S3. T<sub>8</sub>sen-high status is associated with CMV+ status in RCC patients.** T<sub>8</sub>sen status was assessed in thawed PBMC of 51 RCC patients with available CMV status. (A) Proportions of CMV+ patients are represented according to T<sub>8</sub>sen status, proportions of T<sub>8</sub>sen<sup>high</sup> patients are represented according to CMV status. (B) %T<sub>8</sub>sen is compared between CMV+ and CMV- patients. The horizontal dotted line represent a proportion of CD8<sup>+</sup> senescent T cells of 39.5% among CD8<sup>+</sup> cells. Categorical variables (T<sub>8</sub>sen<sup>high/low</sup>, CMV+/-) were compared by Fisher test, continuous variables were compared in two populations by Mann-Whitney t-test.

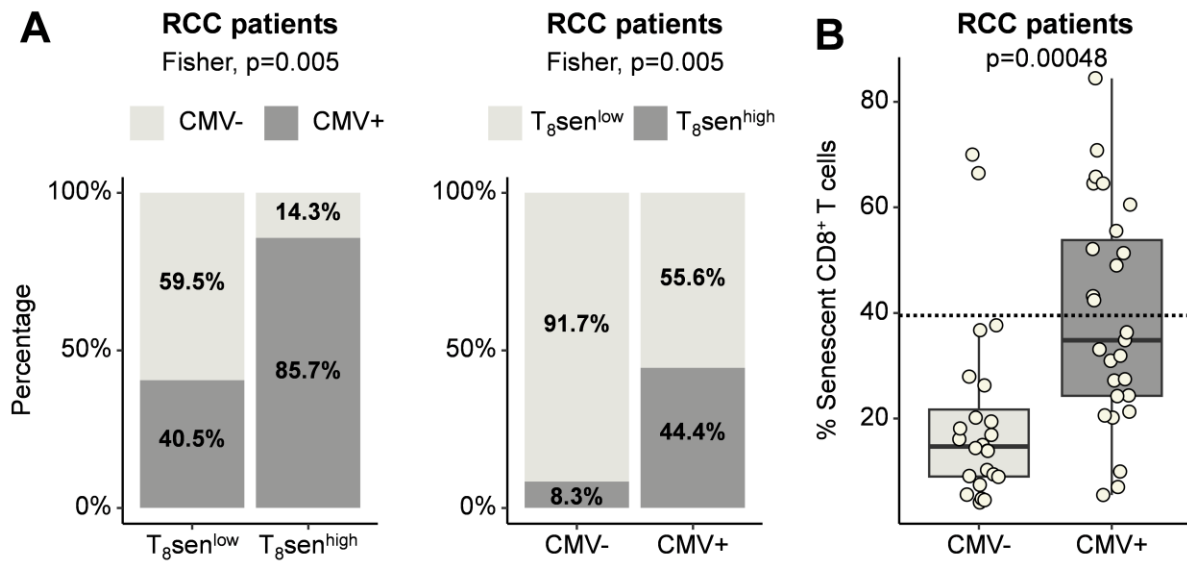

**Fig. S4. Impact of coinfections with other herpesviruses in CMV+ patients.** Proportions of CD8<sup>+</sup> senescent T cells among CD8<sup>+</sup> cells is compared between seropositive and seronegative patients for other herpesviruses in n=117 CMV+ patients (VirScan). (B) %T<sub>8sen</sub> depending on EBV and CMV coinfection status.

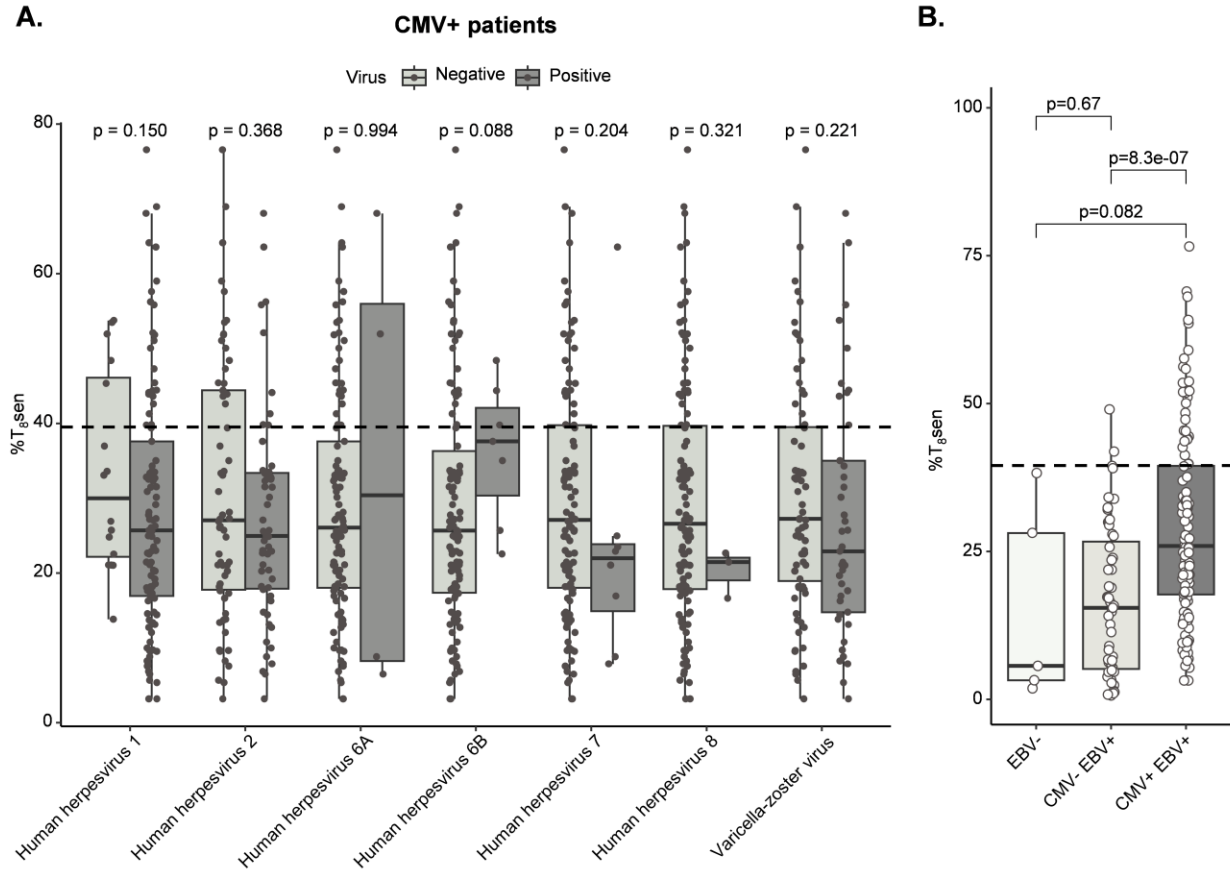

**Fig. S5. Gating strategy for the identification of CMV and EBV-specific cells.** Identification of (A) CMV (pp65 and IE1) and EBV (BMLF1 and EBNA 3B) specific CD8<sup>+</sup> cells ; (B) CMV (gB) specific CD4<sup>+</sup> cells ; (C) IFN- $\gamma$ <sup>+</sup>-producing CD4<sup>+</sup> cells after stimulation with DMSO, PMA/ionomycin or gB peptide.

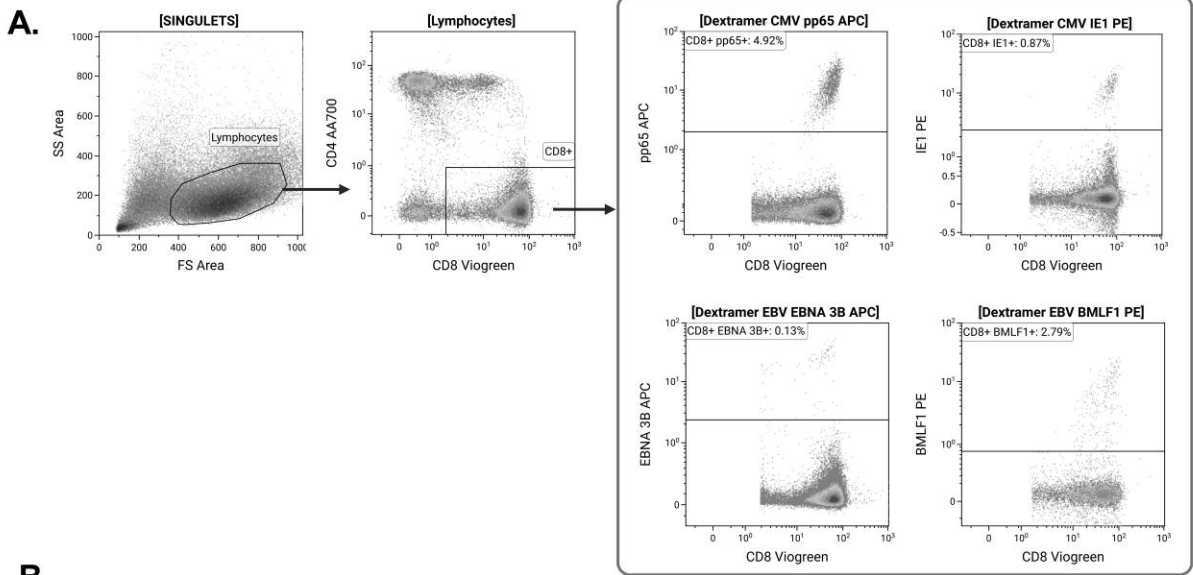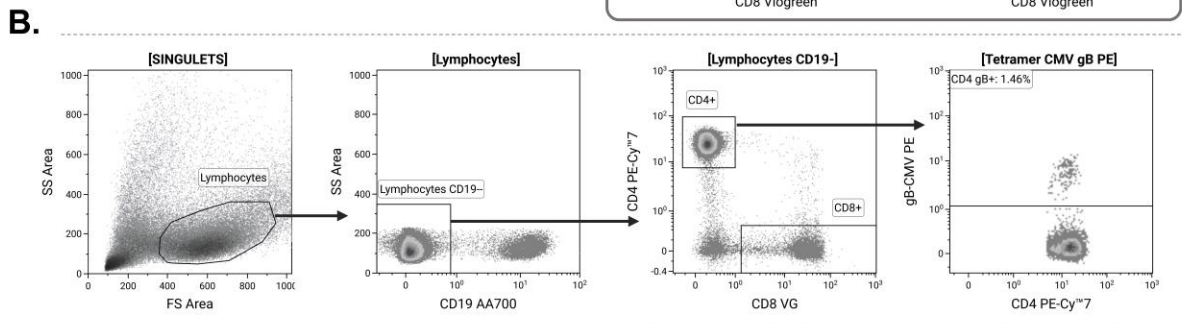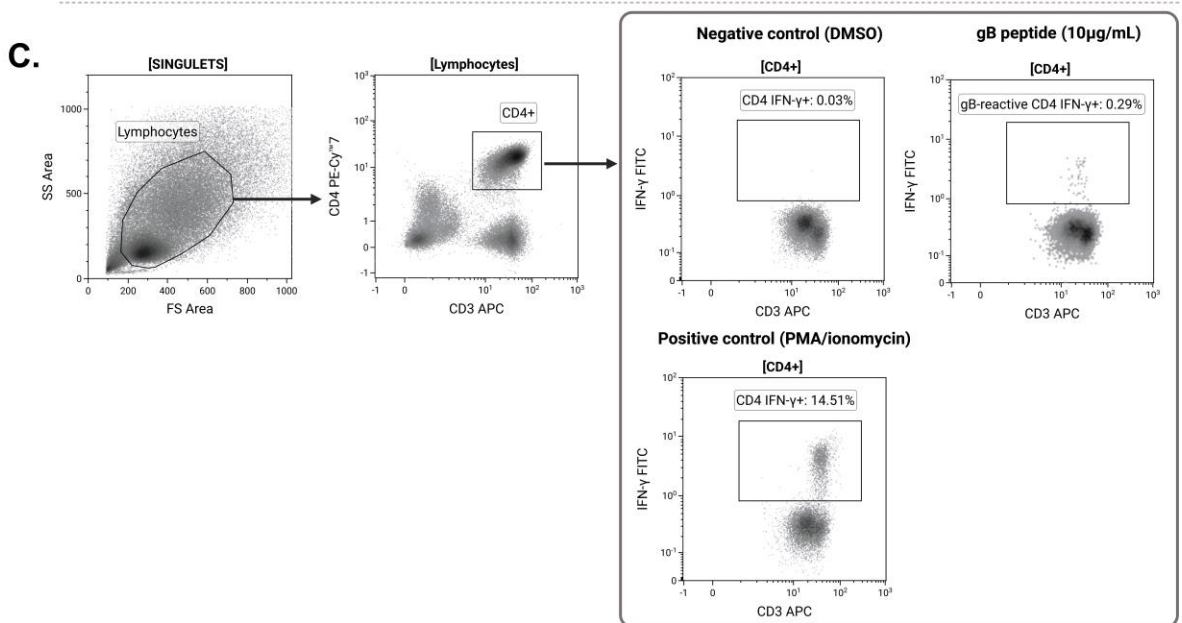



**Fig. S6. CMV and T<sub>8</sub>sen status were not associated with PFS nor OS in the PCT-treated cohort.** In 42 aNSCLC patients treated by PCT, (A) probability of PFS and OS depending on CMV status and (B) PFS and OS depending on CMV and T<sub>8</sub>sen status. Survival curves were analyzed using a Cox regression model.

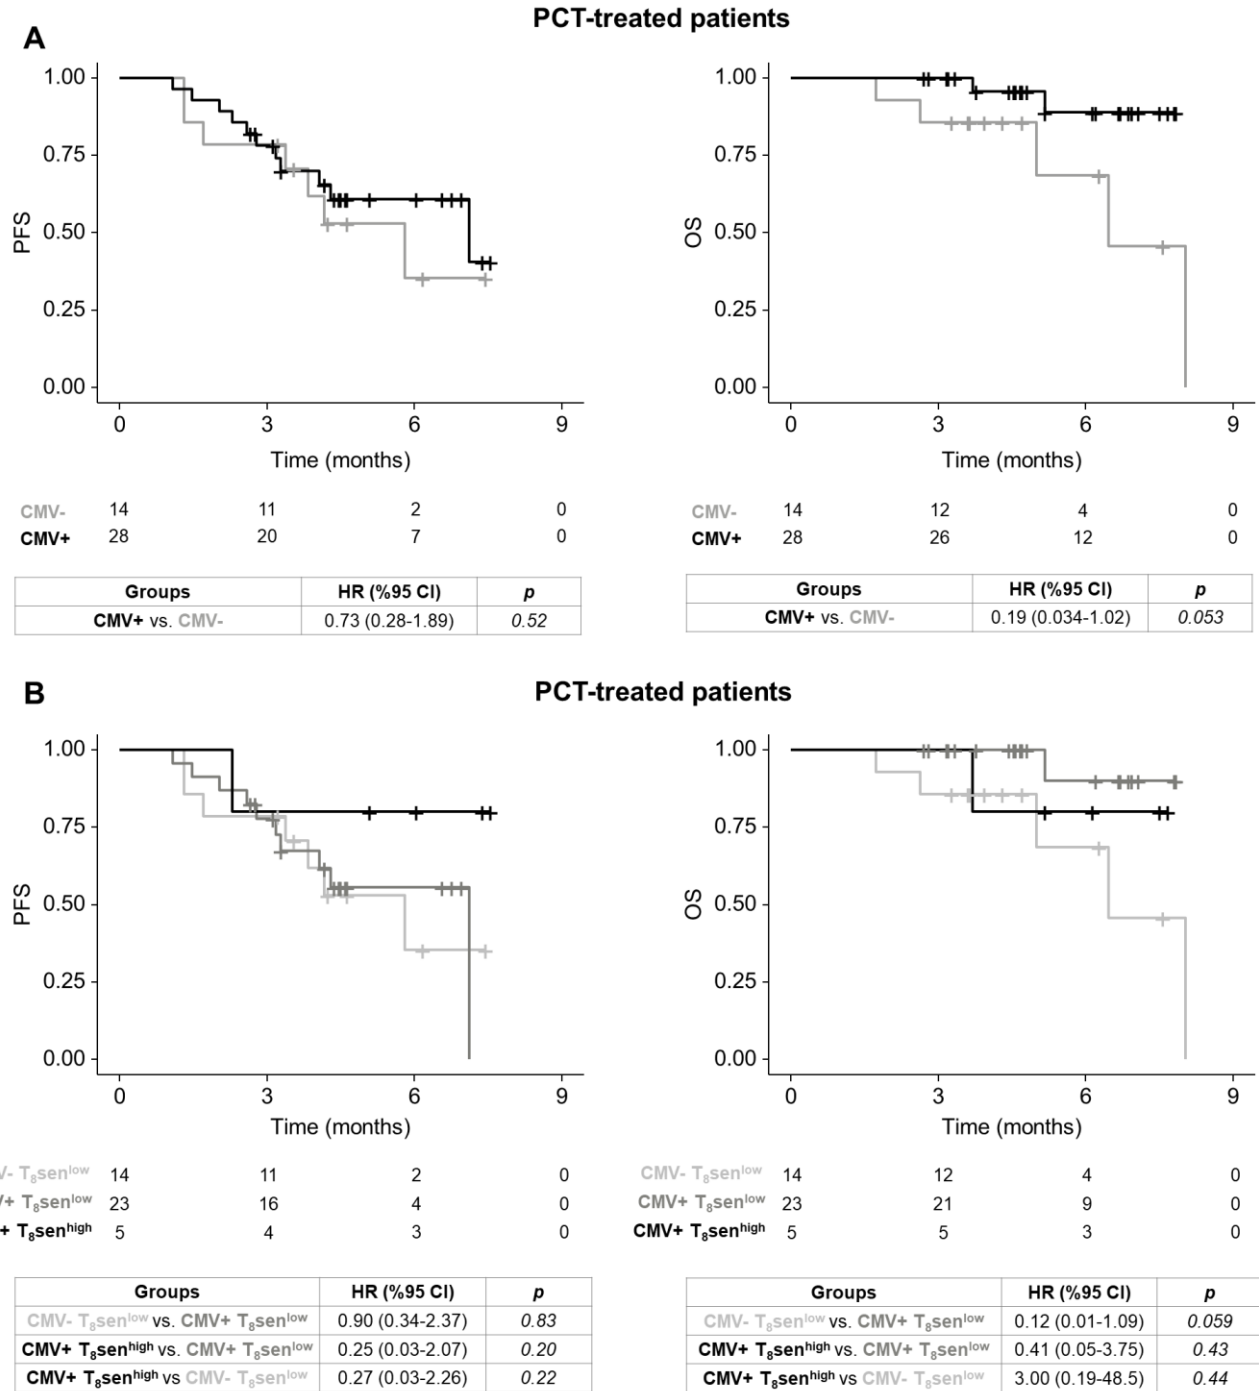

**Fig. S7. Flow-chart of the study design.** This figure illustrates the analyses performed on the different samples. Samples from patients assessed for **VirScan™**, type I IFN signature and plasmatic dosages had a SIP status. aNSCLC: advanced non-small cell lung cancer; CMV: cytomegalovirus; HV: healthy volunteers; ICB: immune-checkpoint blockers; IFN: interferon; MSD: meso-scale discovery quantification of soluble proteins; pts: patients; SA-βgal: senescence-associated beta-galactosidase; T<sub>8</sub>sen: senescent CD8<sup>+</sup> T cells defined by the proportion of CD28<sup>-</sup> CD57<sup>+</sup>KLRG1<sup>+</sup> T cells among CD8<sup>+</sup>.

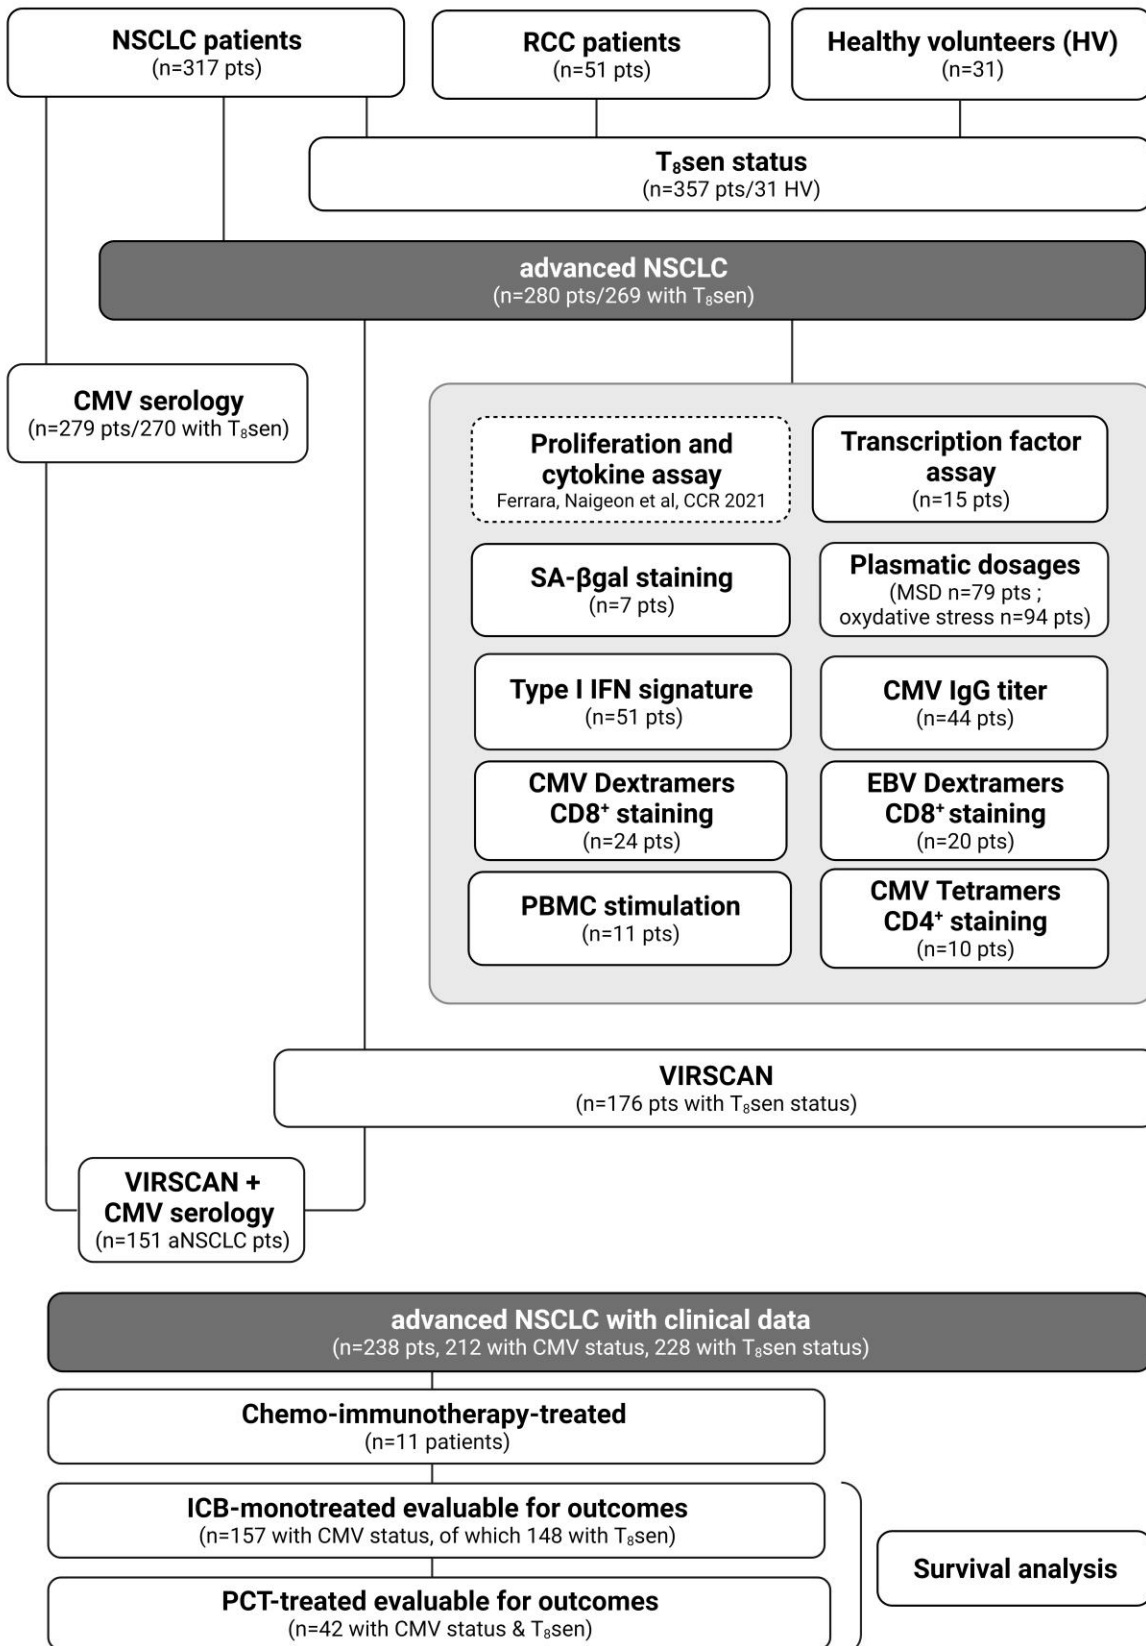

**Table S1. aNSCLC patients' characteristics.** Abbreviation: BMI, body mass index; CMV, cytomegalovirus; dNLR, derived neutrophils-to-lymphocyte ratio; CRP, C-reactive protein; ICB, immune checkpoint blockers; NA, not available; NR, not reached; OS, overall survival; PCT, polychemotherapy; PD-L1 TPS, PD-L1 tumor-proportion score; PFS, progression-free survival; PY, pack-year; T<sub>8</sub>sen, senescent CD8<sup>+</sup> T cells defined by the proportion of CD28<sup>-</sup>CD57<sup>+</sup>KLRG1<sup>+</sup> T cells among CD8<sup>+</sup>.

|                                             | PCT cohort -<br>(n=61) | ICB-treated patients<br>(PREMIS) -<br>(n=121) | ICB-treated patients<br>(CTC) - (n=56) |
|---------------------------------------------|------------------------|-----------------------------------------------|----------------------------------------|
| <b>Clinical characteristics</b>             |                        |                                               |                                        |
| Age - median (range)                        | 63 (38-92)             | 63.9 (31.5-87.2)                              | 61.76 (39-92.86)                       |
| BMI - median (range)                        | NA                     | 23.1 (16.2-37)                                | 23.21 (15.22-31.95)                    |
| Smoking status                              |                        |                                               |                                        |
| Ongoing - n(%)                              | 0 (0)                  | 25 (20.66)                                    | 19 (33.93)                             |
| Stopped - n(%)                              | 0 (0)                  | 82 (67.77)                                    | 31 (55.36)                             |
| Never - n(%)                                | 0 (0)                  | 11 (9.09)                                     | 4 (7.14)                               |
| NA - n(%)                                   | 61 (100)               | 3 (0.98)                                      | 2 (3.57)                               |
| PY - median (range)                         | NA                     | 34 (5-730)                                    | 40 (0-80)                              |
| <b>Tumor characteristics</b>                |                        |                                               |                                        |
| Stage                                       |                        |                                               |                                        |
| Stage IV - n(%)                             | 51 (83.61)             | 114 (94.21)                                   | 47 (83.93)                             |
| Stage III - n(%)                            | 10 (16.39)             | 7 (5.79)                                      | 7 (12.50)                              |
| NA - n(%)                                   | 0 (0)                  | 0 (0)                                         | 2 (3.57)                               |
| PD-L1 TPS                                   |                        |                                               |                                        |
| PD-L1 <1% - n(%)                            | 0 (0)                  | 35 (28.93)                                    | 13 (23.21)                             |
| PD-L1 1-49% - n(%)                          | 0 (0)                  | 34 (28.1)                                     | 9 (16.07)                              |
| PD-L1 ≥50% - n(%)                           | 0 (0)                  | 43 (35.54)                                    | 17 (30.36)                             |
| NA - n(%)                                   | 61 (100)               | 9 (7.44)                                      | 17 (30.36)                             |
| Number of metastatic sites - median (range) | 1 (0-7)                | 3 (1-6)                                       | 2 (0-5)                                |
| Molecular biology                           |                        |                                               |                                        |
| KRAS mutation - n(%)                        | 15 (24.59)             | 44 (36.36)                                    | 22 (39.29)                             |
| EGFR mutation - n(%)                        | 1 (1.64)               | 5 (4.13)                                      | 0 (0)                                  |
| ALK alteration - n(%)                       | 1 (1.64)               | 0 (0)                                         | 0 (0)                                  |
| Other targetable alteration - n(%)          | 23 (37.7)              | 3 (2.48)                                      | 7 (12.5)                               |
| No targetable alteration - n(%)             | 19 (31.15)             | 23 (19.01)                                    | 16 (28.57)                             |
| NA - n(%)                                   | 2 (3.28)               | 46 (38.02)                                    | 11 (19.64)                             |
| Radiotherapy before or after immunotherapy  |                        |                                               |                                        |
| Yes - n (%)                                 | 0 (0)                  | 48 (39.67)                                    | 29 (51.79)                             |
| No - n (%)                                  | 0 (0)                  | 47 (38.84)                                    | 25 (44.64)                             |
| NA - n (%)                                  | 61 (100)               | 26 (21.49)                                    | 2 (3.57)                               |
| Previous chemotherapy                       |                        |                                               |                                        |
| Yes - n (%)                                 | 0 (0)                  | 61 (50.41)                                    | 49 (87.50)                             |
| No - n (%)                                  | 0 (0)                  | 34 (28.1)                                     | 5 (8.93)                               |
| NA - n (%)                                  | 61 (100)               | 26 (21.49)                                    | 2 (3.57)                               |
| Immunotherapy line                          |                        |                                               |                                        |
| First line - n (%)                          | 0 (0)                  | 56 (46.28)                                    | 5 (8.93)                               |
| Second line - n (%)                         | 0 (0)                  | 50 (41.32)                                    | 40 (71.43)                             |
| Third line and more - n (%)                 | 0 (0)                  | 15 (12.4)                                     | 9 (16.07)                              |
| NA - n(%)                                   | 0 (0)                  | 0 (0)                                         | 2 (3.57)                               |
| <b>Biology</b>                              |                        |                                               |                                        |
| T <sub>8</sub> sen status (> or <39.5%)     |                        |                                               |                                        |
| High (>39.5%) - n (%)                       | 7 (11.48)              | 25 (20.66)                                    | 13 (23.21)                             |

|                                                          |                   |                    |                    |
|----------------------------------------------------------|-------------------|--------------------|--------------------|
| Low ( $\leq 39.5\%$ ) - n (%)                            | 54 (88.52)        | 95 (78.51)         | 34 (60.71)         |
| NA - n (%)                                               | 0 (0)             | 1 (0.83)           | 9 (16.07)          |
| % T <sub>8</sub> sen among CD8+ T cells - median (range) | 22.54 (0.8-76.54) | 22.23 (0-68.94)    | 22.11 (2.26-63.74) |
| <b>CMV serology</b>                                      |                   |                    |                    |
| Positive - n (%)                                         | 28 (45.9)         | 67 (55.37)         | 30 (53.57)         |
| Negative - n (%)                                         | 14 (22.95)        | 48 (39.67)         | 25 (44.64)         |
| NA - n (%)                                               | 19 (31.15)        | 6 (4.96)           | 1 (1.79)           |
| dNLR - median (range)                                    | NA                | 3.23 (0.71-23.17)  | 2.32 (0.56-20.25)  |
| Albumin - median (range)                                 | NA                | 39 (23-49)         | NA                 |
| CRP - median (range)                                     | NA                | 21 (0-236)         | NA                 |
| <b>Outcomes</b>                                          |                   |                    |                    |
| PFS (months) - median (95%CI)                            | 4.98 (4.16-7.11)  | 3.78 (2.76-5.75)   | 5.36 (2.01-7.99)   |
| OS (months) - median (95%CI)                             | 8.03 (7.07-NR)    | 12.89 (9.76-19.59) | 13.18 (7.04-24.23) |

**Table S2. Number of patients with detectable antibodies targeting each virus screened with VirScan™ assay. Only viruses against which at least one patient was seropositive (n=48) are indicated**

| <b>Virus</b>                        | <b>Number (%) of seropositive patients</b> |
|-------------------------------------|--------------------------------------------|
| Epstein-Barr virus                  | 171 (97.16%)                               |
| Human respiratory syncytial virus   | 164 (93.18%)                               |
| Human herpesvirus 1                 | 136 (77.27%)                               |
| Human cytomegalovirus               | 117 (66.48%)                               |
| Influenza A virus                   | 93 (52.84%)                                |
| Poliovirus type 1                   | 93 (52.84%)                                |
| Human herpesvirus 2                 | 71 (40.34%)                                |
| Varicella-zoster virus              | 63 (35.8%)                                 |
| Human adenovirus C serotype 2       | 59 (33.52%)                                |
| Influenza B virus                   | 56 (31.82%)                                |
| Cercopithecine herpesvirus 16       | 33 (18.75%)                                |
| Human rhinovirus 23                 | 27 (15.34%)                                |
| Cercopithecine herpesvirus 1        | 18 (10.23%)                                |
| Hepatitis B virus                   | 14 (7.95%)                                 |
| Influenza C virus                   | 12 (6.82%)                                 |
| Human herpesvirus 6B                | 10 (5.68%)                                 |
| Human herpesvirus 7                 | 9 (5.11%)                                  |
| Rubella virus                       | 9 (5.11%)                                  |
| Human adenovirus A serotype 12      | 8 (4.55%)                                  |
| Human herpesvirus 6A                | 8 (4.55%)                                  |
| Chikungunya virus                   | 7 (3.98%)                                  |
| Human parvovirus B19                | 7 (3.98%)                                  |
| Vaccinia virus                      | 7 (3.98%)                                  |
| Human adenovirus E serotype 4       | 5 (2.84%)                                  |
| Human hepatitis A virus genotype IA | 4 (2.27%)                                  |
| Human herpesvirus 8                 | 4 (2.27%)                                  |
| Human respiratory syncytial virus A | 4 (2.27%)                                  |
| Orf virus                           | 4 (2.27%)                                  |
| Saimiriine herpesvirus 2            | 4 (2.27%)                                  |
| Human adenovirus C serotype 5       | 3 (1.7%)                                   |
| Human respiratory syncytial virus B | 3 (1.7%)                                   |
| Cowpox virus                        | 2 (1.14%)                                  |
| Hepatitis E virus                   | 2 (1.14%)                                  |
| Human adenovirus B serotype 7       | 2 (1.14%)                                  |
| Human herpesvirus 8 type P          | 2 (1.14%)                                  |
| Tanapox virus                       | 2 (1.14%)                                  |
| Yaba monkey tumor virus             | 2 (1.14%)                                  |
| Zaire ebolavirus                    | 2 (1.14%)                                  |
| BK polyomavirus                     | 1 (0.57%)                                  |
| Hepatitis delta virus               | 1 (0.57%)                                  |
| Human adenovirus 55                 | 1 (0.57%)                                  |
| Human adenovirus A serotype 18      | 1 (0.57%)                                  |
| Human adenovirus B serotype 3       | 1 (0.57%)                                  |
| Human adenovirus D serotype 9       | 1 (0.57%)                                  |
| Human adenovirus F serotype 40      | 1 (0.57%)                                  |
| Human coronavirus HKU1              | 1 (0.57%)                                  |
| Human herpesvirus 3                 | 1 (0.57%)                                  |

|                                       |           |
|---------------------------------------|-----------|
| Human parainfluenza 3 virus           | 1 (0.57%) |
| Merkel cell polyomavirus              | 1 (0.57%) |
| Molluscum contagiosum virus subtype 1 | 1 (0.57%) |
| Reston ebolavirus                     | 1 (0.57%) |
| Simian virus 40                       | 1 (0.57%) |
| Torque teno virus                     | 1 (0.57%) |

**Table S3. T<sub>8sen</sub><sup>high</sup> status is not associated with specific EBV-protein immunization.** Pan-virus serological profile was assessed in sera of 176 patients with aNSCLC. Protein reactivity was positive if at least one peptide was recognized (enrichment fold-change>1). In EBV+ patients (n=171), proportions of CD8<sup>+</sup> senescent T cells were analyzed according to reactivity against 22 proteins with at least 20% of protein-seropositive patients and 20% of protein-seronegative patients, by Mann-Whitney test. Proportions of protein-seropositive patients were then compared between T<sub>8sen</sub><sup>high</sup> and T<sub>8sen</sub><sup>low</sup> patients by Fisher's test. T<sub>8sen</sub>: senescent CD8<sup>+</sup> T cells defined by the proportion of CD28<sup>-</sup>CD57<sup>+</sup>KLRG1<sup>+</sup> T cells among CD8<sup>+</sup>; EBNA: EBV nuclear antigen

| Protein                                                                                               | Number and [proportion] of protein-seropositive patients | Median CD8 <sup>+</sup> senescent T cells proportions |                       |               | Proportions of protein-seropositive patients |                                               |         |
|-------------------------------------------------------------------------------------------------------|----------------------------------------------------------|-------------------------------------------------------|-----------------------|---------------|----------------------------------------------|-----------------------------------------------|---------|
|                                                                                                       |                                                          | Seronegative patients                                 | Seropositive patients | p-value       | In T <sub>8sen</sub> <sup>low</sup> patients | In T <sub>8sen</sub> <sup>high</sup> patients | p-value |
| Nuclear antigen EBNA-1 (Fragment)                                                                     | 106 [61.99 %]                                            | 27.08                                                 | 19.26                 | <b>0.0073</b> | 65.00                                        | 48.39                                         | 0.1028  |
| Envelope glycoprotein M (gM)                                                                          | 38 [22.22 %]                                             | 24.87                                                 | 19.73                 | <b>0.0203</b> | 25.00                                        | 9.68                                          | 0.0925  |
| Putative uncharacterized protein                                                                      | 41 [23.98 %]                                             | 24.56                                                 | 16.62                 | 0.0699        | 25.00                                        | 19.35                                         | 0.6438  |
| Deneddylase (EC 3.4.19.12/ EC 3.4.22.-) (Large tegument protein)                                      | 77 [45.03 %]                                             | 21.07                                                 | 24.87                 | 0.0886        | 42.86                                        | 54.84                                         | 0.2382  |
| Capsid scaffolding protein (Capsid protein P40/pPR/BVRF2) [Cleaved into: Assemblin, Assembly protein] | 99 [57.89 %]                                             | 23.10                                                 | 22.53                 | 0.0920        | 60.71                                        | 45.16                                         | 0.1586  |
| EBNA-3 (EBNA-3A)                                                                                      | 107 [62.57 %]                                            | 25.51                                                 | 22.53                 | 0.1425        | 65.71                                        | 48.39                                         | 0.0998  |
| Envelope glycoprotein B (gB) (GP115) (Glycoprotein GP110)                                             | 43 [25.15 %]                                             | 23.22                                                 | 22.53                 | 0.1508        | 27.14                                        | 16.13                                         | 0.2558  |
| BZLF1                                                                                                 | 119 [69.59 %]                                            | 24.90                                                 | 21.92                 | 0.2032        | 70.00                                        | 67.74                                         | 0.8308  |
| BZLF2 (Fragment)                                                                                      | 47 [27.49 %]                                             | 23.10                                                 | 22.54                 | 0.2436        | 29.29                                        | 19.35                                         | 0.3738  |
| Glycoprotein 42 (gp42)                                                                                | 106 [61.99 %]                                            | 24.96                                                 | 22.21                 | 0.3231        | 62.14                                        | 61.29                                         | 1.0000  |
| Uncharacterized protein BLRF3 (Fragment)                                                              | 36 [21.05 %]                                             | 24.31                                                 | 18.25                 | 0.3321        | 20.71                                        | 22.58                                         | 0.8103  |
| Trans-activator protein BZLF1 (EB1) (Zebra)                                                           | 115 [67.25 %]                                            | 23.22                                                 | 22.53                 | 0.3357        | 67.86                                        | 64.52                                         | 0.8328  |
| BLLF1                                                                                                 | 79 [46.2 %]                                              | 25.20                                                 | 21.42                 | 0.3502        | 47.14                                        | 41.94                                         | 0.6919  |
| EBNA-4 (EBNA-3B)                                                                                      | 126 [73.68 %]                                            | 24.81                                                 | 22.54                 | 0.4078        | 75.00                                        | 67.74                                         | 0.4989  |
| EBNA-LP (EBNA-5)                                                                                      | 78 [45.61 %]                                             | 23.90                                                 | 21.66                 | 0.4094        | 47.86                                        | 35.48                                         | 0.2367  |



|                                                |               |       |       |        |       |       |        |
|------------------------------------------------|---------------|-------|-------|--------|-------|-------|--------|
| Envelope glycoprotein GP350 (Membrane antigen) | 85 [49.71 %]  | 24.89 | 21.42 | 0.4735 | 50.71 | 45.16 | 0.6920 |
| Tegument protein BKRF4                         | 50 [29.24 %]  | 21.89 | 24.11 | 0.6333 | 28.57 | 32.26 | 0.6685 |
| Tegument protein BLRF2                         | 123 [71.93 %] | 23.22 | 22.53 | 0.7479 | 70.71 | 77.42 | 0.5148 |
| EBNA2 (Fragment)                               | 131 [76.61 %] | 24.80 | 22.54 | 0.7773 | 78.57 | 67.74 | 0.2407 |
| EBNA1 (Fragment)                               | 133 [77.78 %] | 25.27 | 21.92 | 0.8541 | 76.43 | 83.87 | 0.4769 |
| EBNA-1 protein (Fragment)                      | 77 [45.03 %]  | 23.51 | 21.89 | 0.8852 | 44.29 | 48.39 | 0.6946 |
| EBNA3B                                         | 95 [55.56 %]  | 22.73 | 22.65 | 1.0000 | 54.29 | 61.29 | 0.5516 |

**Table S4. Antibodies used in flow cytometry experiments.**

AA: allophycocyaning Alexa Fluor; APC: allophycocyanin; BV: Brilliant Violet™; ECD: electron-coupled dye; FITC: fluorescein isothiocyanate; KrOr: krome orange; PC5.5: PerCP-cyanine 5.5; PCy7: phycoerythrin-cyanine 7; PE: phycoerythrin.

| Target  | Fluorochrome    | Provider          | Dilution | Clone   | Reference   | Panel                                                                     |
|---------|-----------------|-------------------|----------|---------|-------------|---------------------------------------------------------------------------|
| CD28    | APC-Vio770      | Miltenyi Biotec   | 1:50     | REA612  | 130-116-506 | TF, T <sub>8</sub> sen                                                    |
| CD28    | ECD             | Beckman Coulter   | 1:10     | CD28.2  | 6607111     | SA-βgal, T <sub>8</sub> sen, CD8 Dextramers, CD4 Tetramers                |
| CD28    | PE-Vio615       | Miltenyi Biotec   | 1:50     | REA612  | 130-120-034 | T <sub>8</sub> sen                                                        |
| CD28    | PE              | Beckman Coulter   | 1:10     | CD28.2  | IM2071U     | T <sub>8</sub> sen                                                        |
| CD3     | APC             | Miltenyi Biotec   | 1:50     | REA613  | 130-113-135 | TF, Cytokines                                                             |
| CD3     | AA750           | Beckman Coulter   | 1:20     | UCHT1   | A94680      | SA-βgal, T <sub>8</sub> sen                                               |
| CD3     | APC-Vio770      | Miltenyi Biotec   | 1:50     | REA613  | 130-113-136 | T <sub>8</sub> sen                                                        |
| CD3     | PE-Vio615       | Miltenyi Biotec   | 1:50     | REA613  | 130-114-520 | T <sub>8</sub> sen                                                        |
| CD4     | AA700           | Beckman Coulter   | 1:20     | B10824  | 13B8.2      | TF, SA-βgal, T <sub>8</sub> sen, CD8 Dextramers                           |
| CD4     | KrOr            | Beckman Coulter   | 1:20     | A82789  | 13B8.2      | T <sub>8</sub> sen                                                        |
| CD4     | Viobright R720  | Miltenyi Biotec   | 1:50     | REA623  | 130-127-378 | T <sub>8</sub> sen                                                        |
| CD4     | PE-Cy™7         | BD Biosciences    | 1:20     | SK3     | 557852      | CD4 Tetramers, Cytokines                                                  |
| CD19    | AA700           | Beckman Coulter   | 1:20     | J3-1 19 | B49212      | CD4 Tetramers                                                             |
| CD45RA  | PCy7            | Beckman Coulter   | 1:20     | 2H4     | B10821      | TF, T <sub>8</sub> sen                                                    |
| CD45RA  | PercPVio770     | Miltenyi Biotec   | 1:50     | REA562  | 130-113-368 | SA-βgal, T <sub>8</sub> sen                                               |
| CD45RA  | PE-Vio770       | Miltenyi Biotec   | 1:50     | REA1047 | 130-117-746 | T <sub>8</sub> sen                                                        |
| CD56    | PE-Vio615       | Miltenyi Biotec   | 1:50     | REA196  | 130-114-550 | TF                                                                        |
| CD56    | APC             | Miltenyi Biotec   | 1:50     | REA196  | 130-113-310 | SA-βgal, T <sub>8</sub> sen                                               |
| CD56    | AA700           | Beckman Coulter   | 1:20     | N901    | B92446      | T <sub>8</sub> sen                                                        |
| CD56    | ECD             | Beckman Coulter   | 1:20     | N901    | A82943      | T <sub>8</sub> sen                                                        |
| CD57    | FITC            | Miltenyi Biotec   | 1:50     | TB03    | 130-122-935 | TF, T <sub>8</sub> sen, CD8 Dextramers                                    |
| CD57    | FITC            | Beckman Coulter   | 1:10     | NC1     | IM0466U     | T <sub>8</sub> sen                                                        |
| CD57    | APC-Vio770      | Miltenyi Biotec   | 1:50     | REA769  | 130-111-813 | CD4 Tetramers, Cytokines                                                  |
| CD57    | PE-Vio770       | Miltenyi Biotec   | 1:50     | REA769  | 130-111-812 | SA-βgal, T <sub>8</sub> sen                                               |
| CD8     | VioGreen        | Miltenyi Biotec   | 1:50     | REA734  | 130-110-684 | TF, SA-βgal, T <sub>8</sub> sen, CD8 Dextramers, CD4 Tetramers, Cytokines |
| CD8     | APC             | Beckman Coulter   | 1:20     | IM2469  | B9.11       | T <sub>8</sub> sen                                                        |
| Eomes   | PE              | BD Biosciences    | 1:10     | X4-83   | 566749      | TF                                                                        |
| IFN-γ   | FITC            | Miltenyi          | 1:50     | REA600  | 130-113-497 | Cytokines                                                                 |
| KLRG1   | BV421™          | Biolegend         | 1:20     | 2F1     | 138414      | TF, SA-βgal, T <sub>8</sub> sen                                           |
| KLRG1   | PE              | Miltenyi Biotec   | 1:10     | REA261  | 130-103-638 | T <sub>8</sub> sen                                                        |
| KLRG1   | Vioblue         | Miltenyi Biotec   | 1:50     | REA261  | 130-123-526 | T <sub>8</sub> sen                                                        |
| KLRG1   | PerCP-eFluor710 | Invitrogen        | 1:20     | 13F12F2 | 46-9488-42  | T <sub>8</sub> sen                                                        |
| T-bet   | PC5.5           | Thermo/Invitrogen | 1:10     | 4B10    | 45-5825-82  | TF                                                                        |
| TCR α/β | APC/Cy7         | Biolegend         | 1:20     | IP26    | 306728      | T <sub>8</sub> sen                                                        |

**Table S5. Plasma cytokine and soluble protein assays.** The reference of the kits and sample dilutions are given for each soluble protein. LLOD: lower limit of detection

| Target cytokine / soluble protein | Provider | Kit                                 | Catalog number | Sample dilution | LLOD                          |
|-----------------------------------|----------|-------------------------------------|----------------|-----------------|-------------------------------|
| IFN- $\beta$                      | MSD      | U-PLEX Immuno-Oncology Group 1 (hu) | K151AEL-1      | 1:1             | 3.1 pg/ml                     |
| IL-6                              | MSD      |                                     |                |                 | 0.33 pg/ml                    |
| IL-8                              | MSD      |                                     |                |                 | 0.15 pg/ml                    |
| IL-10                             | MSD      |                                     |                |                 | 0.14 pg/ml                    |
| IL-29/IFN- $\lambda$ 1            | MSD      |                                     |                |                 | 1.2 pg/ml                     |
| IP-10                             | MSD      |                                     |                |                 | 0.49 pg/ml                    |
| PD-L1                             | MSD      |                                     |                |                 | 0.09 pg/ml                    |
| TNF- $\alpha$                     | MSD      |                                     |                |                 | 0.51 pg/ml                    |
| IFN- $\alpha$ 2a                  | MSD      |                                     |                |                 | S-PLEX Human IFN- $\alpha$ 2a |
| VCAM-1                            | MSD      | V-PLEX Human VCAM-1                 | K151SRD-1      | 1:1000          | 6 pg/ml                       |
| MPO                               | MSD      | R-PLEX Human MPO                    | K1514ER-2      | 1:20            | 11 pg/ml                      |
| Elastase                          | Abcam    | Human Neutrophil Elastase ELISA Kit | ab270204       | 1:2000-1:10000  | 47 pg/ml                      |

**Table S6. TaqMan™ assays references used for RT-qPCR**

| <b>Gene name</b> | <b>Translated protein</b> | <b>TaqMan™ probes references</b> | <b>Provider</b>         |
|------------------|---------------------------|----------------------------------|-------------------------|
| <i>MX1</i>       | Mx1                       | Hs00895608_m1                    | ThermoFisher Scientific |
| <i>IFITM1</i>    | IFITM1                    | Hs00705137_s1                    |                         |
| <i>IFIT1</i>     | IFIT1                     | Hs01675197_m1                    |                         |
| <i>IFI44</i>     | IFI44                     | Hs00197427_m1                    |                         |
| <i>LY6E</i>      | Ly6E                      | Hs00158942_m1                    |                         |
| <i>ACTB</i>      | Actin beta                | Hs99999903_m1                    |                         |
